# Supplementary material for: Deformable nature of various damaged DNA duplexes estimated by an electrochemical analysis on electrodes
Source: Royal Society of Chemistry journal article supplement (doi:10.1039/c4cc04513k), 2014-01-01
Supplement: c4cc04513k1.pdf [file c4cc04513k1.pdf]

Electronic Supplementary Information for

## Deformable nature of various damaged DNA duplexes estimated by an electrochemical analysis on electrodes

Junya Chiba,<sup>\*a</sup> Shun Aoki,<sup>a</sup> Junpei Yamamoto,<sup>b</sup> Shigenori Iwai<sup>b</sup> and Masahiko Inouye<sup>\*a</sup>

<sup>a</sup> Graduate School of Pharmaceutical Sciences, University of Toyama, 2630 Sugitani, Toyama 930-0194, Japan

<sup>b</sup> Graduate School of Engineering Science, Osaka University, 1-3 Machikaneyama, Toyonaka, Osaka 560-8531, Japan

### Experimental Section

**Materials.** DNA probes (**Fc1** and **Fc2**)<sup>s1</sup> and CPD or 6–4PP containing oligomers<sup>s2</sup> were synthesized according to the procedure previously reported. Fully-matched and AP<sup>THF</sup> containing complements were all commercially available.

**Preparation of probe-modified gold electrodes.** Commercially available gold electrodes (Tanaka Kikinzoku, Tokyo, Japan) were cleaned as a reported procedure<sup>3</sup> and dried under argon stream before use. For immobilization of DNA probes, 1  $\mu\text{L}$  of a probe DNA (100  $\mu\text{M}$ ) in a buffer solution (10 mM sodium cacodylate that contained 0.5 M NaCl, pH 7.0) was placed on the gold electrode and kept in a closed container under high humidity for 90 min at room temperature. After having been rinsed with the buffer solution (300  $\mu\text{L}$ ), the probe DNA-modified gold electrode was soaked in a solution of 1 mM 6-mercaptohexan-1-ol in the buffer solution contained 1% Tween 20 (300  $\mu\text{L}$ ) for 90 min at room temperature. Then, it was thoroughly washed with Milli-Q water and the buffer solution successively. For hybridization of target DNAs, 5  $\mu\text{L}$  of a target DNA (10  $\mu\text{M}$ ) in the buffer solution was placed on the probe-modified gold electrode and kept in a closed container under high humidity for 90 min at room temperature, then it was rinsed with the buffer solution (300  $\mu\text{L}$ ).

**Electrochemical measurements.** CV measurements were carried out in a buffer solution (10 mM sodium cacodylate that contained 0.5 M NaCl, pH 7.0) at 15 °C on the probe-modified electrodes by means of a normal three-electrode configuration consisting of the gold working electrode, a saturated Ag/AgCl reference electrode, and a platinum wire auxiliary electrode. The working compartment of the electrochemical cell was separated from the reference compartment by a glass frit.

**MALDI-TOF Mass Measurements.** MALDI-TOF mass spectra were recorded on a Bruker-Daltonics-Autoflex mass spectrometer operating in the negative ion mode with 3-hydroxypicolinic acid as a matrix. **Fc1** : calcd for [M–H], C<sub>162</sub>H<sub>195</sub>FeN<sub>57</sub>O<sub>88</sub>P<sub>15</sub>S: 4900.77; found 4900.46, **Fc2** : calcd for [M–H], C<sub>179</sub>H<sub>215</sub>FeN<sub>67</sub>O<sub>99</sub>P<sub>17</sub>S: 5502.85; found 5500.41.

**$T_m$  Measurements.**  $T_m$  melting curves (1.0 °C/1.0 min) were obtained by JASCO V-560 UV/VIS spectrophotometer with a peltier and a temperature controller in a temperature range from 20 to 90 °C (10 mm pathlength). The  $T_m$  values were determined from the maxima of the first derivatives of the melting curves measured in a buffer solution: 10 mM sodium cacodylate (pH 7.0), 0.5 M NaCl. Errors were estimated at  $\pm 1.0$  °C.

### References for ESI

S1 (a) M. Inouye, R. Ikeda, M. Takase, T. Tsuru and J. Chiba, *Proc. Natl. Acad. Soci. U. S. A.*, 2005, **102**, 11606; (b) R. Ikeda, J. Chiba and M. Inouye, *e-J. Surf. Sci. Nanotechnol.*, 2005, **3**, 393; (c) R. Ikeda, A. Akaishi, J. Chiba and M. Inouye, *ChemBioChem*, 2007, **8**, 2219.

S2 (a) T. Murata, S. Iwai and E. Ohtsuka, *Nucleic Acids Res.*, 1990, **18**, 7279; (b) S. Iwai, M. Shimizu, H. Kamiya and E. Ohtsuka, *J. Am. Chem. Soc.*, 1996, **118**, 7642.

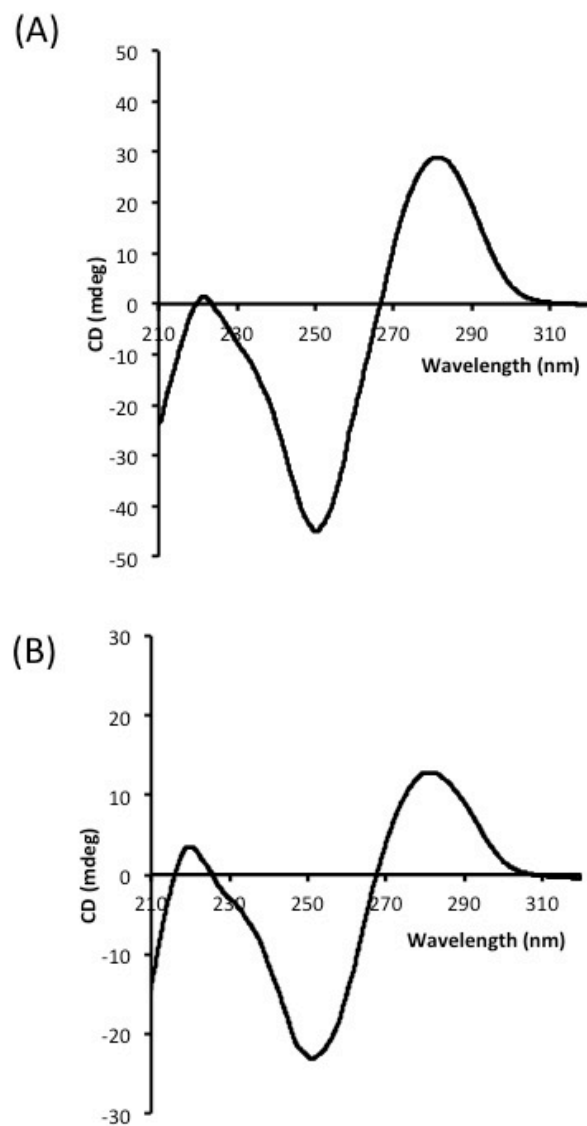

**Figure S1.** Typical CD spectra at 25 °C of ds-DNAs for (A) native **1•Wild<sub>14</sub>** and (B) photo-damaged **1•6-4PP<sub>14</sub>**. CD spectra were recorded on a JASCO-J-720WI spectropolarimeter. Each CD spectrum of **1** (1  $\mu$ M) with 1 equiv of **Wild<sub>14</sub>** or **6-4PP<sub>14</sub>** (1  $\mu$ M) was measured in 10 mM sodium cacodylate that contained 0.5 M NaCl (pH = 7.0).

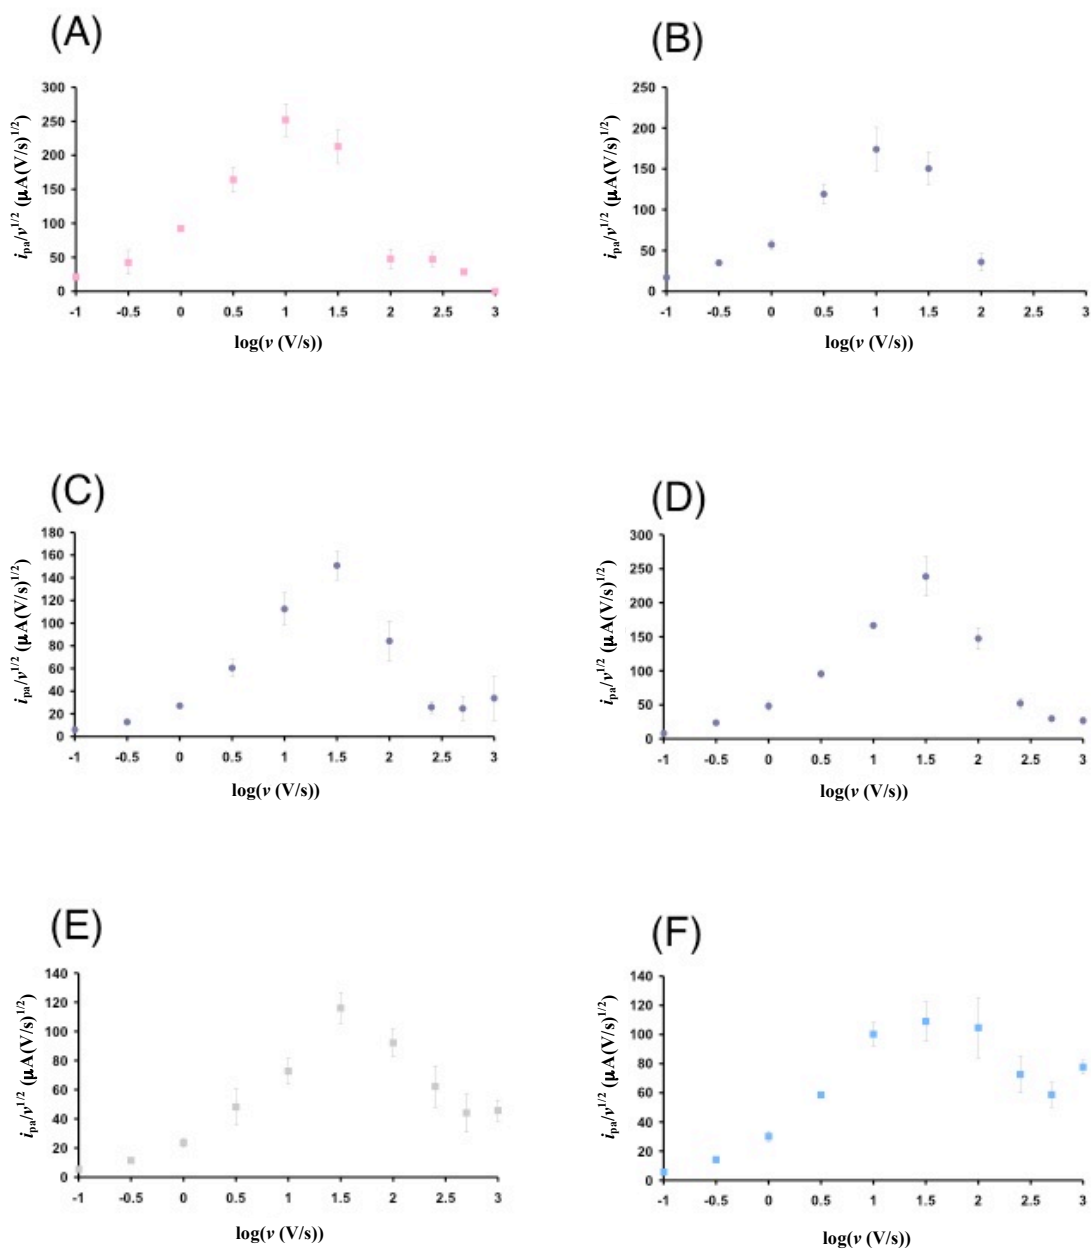

**Figure S2.** Scan rate  $\nu$  dependence of the anodic peak current  $i_{pa}$  ( $i_{pa}/\nu^{1/2}$  vs  $\log(\nu)$ ) of the cyclic voltammograms recorded at the **Fc1**-modified gold electrodes with (A) **Wild**<sub>14</sub>, (B) **CPD**<sub>14</sub>, (C) **AP**<sub>14</sub>, (D) a single-base mismatched complement **AT**<sub>14</sub>, (E) **6-4PP**<sub>14</sub>, and (F) a two-base mismatched complement **AA**<sub>14</sub>.

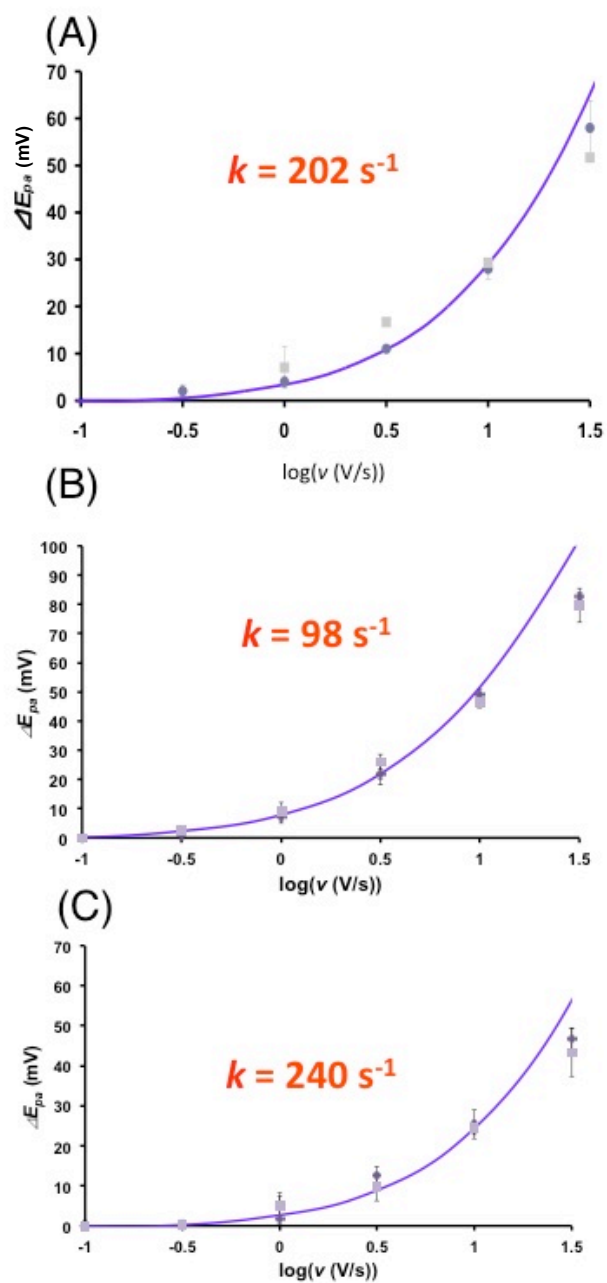

**Figure S3.** Scan rate  $\nu$  dependence of the anodic peak potential  $E_{pa}$  ( $\Delta E_{pa}$  vs  $\log(\nu)$ ) of the cyclic voltammograms recorded at the **Fc1**-modified gold electrodes with (A) **AP**<sub>14</sub>, (B) **CPD**<sub>14</sub>, and (C) **6-4PP**<sub>14</sub>.
